# Supplementary material for: A Novel miRNA-Based Model Can Predict the Prognosis of Clear Cell Renal Cell Carcinoma
Source: PubMed Central journal article supplement — Technol Cancer Res Treat. 2021 Jun 23;20:15330338211027923. doi: 10.1177/15330338211027923 (PMC8237220; doi:10.1177/15330338211027923), 2021-06-23
Supplement: sj-pdf-1-tct-10.1177_15330338211027923.pdf [file sj-pdf-1-tct-10.1177_15330338211027923.pdf]

**TableS2:** Differentially expressed miRNAs with  $|\log_2FC| > 1$  and P value  $< 0.05$ .

| miRNAs           | Log <sub>2</sub> FC | P value   |
|------------------|---------------------|-----------|
| hsa-miR-508-3p   | -4.4151156          | 4.16E-192 |
| hsa-miR-514a-3p  | -4.4560692          | 5.45E-178 |
| hsa-miR-506-3p   | -5.6949856          | 2.15E-175 |
| hsa-miR-514b-5p  | -6.1484478          | 1.54E-147 |
| hsa-miR-508-5p   | -4.75621            | 1.12E-146 |
| hsa-miR-509-3p   | -3.1220244          | 6.00E-126 |
| hsa-miR-532-3p   | -2.1094437          | 7.52E-117 |
| hsa-miR-362-5p   | -2.765147           | 5.72E-110 |
| hsa-miR-514a-5p  | -4.5275298          | 3.11E-102 |
| hsa-miR-509-3-5p | -4.6492649          | 3.56E-95  |
| hsa-miR-500a-3p  | -1.6455177          | 9.53E-86  |
| hsa-miR-129-5p   | -3.801511           | 2.18E-84  |
| hsa-miR-122-5p   | 6.29082528          | 4.11E-78  |
| hsa-miR-210-3p   | 3.02374254          | 6.61E-77  |
| hsa-miR-21-5p    | 2.16147742          | 3.81E-69  |
| hsa-miR-584-5p   | 2.11095802          | 6.67E-66  |
| hsa-miR-2355-5p  | 1.5052624           | 8.15E-66  |
| hsa-miR-155-5p   | 3.51171887          | 1.35E-63  |
| hsa-miR-188-5p   | -1.957313           | 2.16E-63  |
| hsa-miR-3613-5p  | 1.70631692          | 4.97E-63  |
| hsa-miR-15a-5p   | 1.15167555          | 2.21E-62  |
| hsa-miR-429      | -1.84396            | 1.47E-60  |
| hsa-miR-363-3p   | -1.8447958          | 2.05E-59  |
| hsa-miR-106b-3p  | 1.33524527          | 3.86E-59  |
| hsa-miR-660-5p   | -1.6430068          | 3.19E-56  |
| hsa-miR-629-5p   | 1.48895313          | 1.44E-53  |
| hsa-miR-501-3p   | -1.4344036          | 1.08E-50  |
| hsa-miR-106b-5p  | 1.00453474          | 1.81E-49  |
| hsa-miR-16-5p    | 1.04001491          | 2.58E-49  |
| hsa-miR-200a-5p  | -1.4521295          | 1.03E-46  |
| hsa-miR-24-1-5p  | -1.1006813          | 1.58E-46  |
| hsa-miR-200b-5p  | -1.5161503          | 8.15E-45  |
| hsa-miR-125a-5p  | -1.0383304          | 3.40E-44  |
| hsa-miR-20b-3p   | -2.0300386          | 2.21E-43  |
| hsa-miR-200b-3p  | -1.5386375          | 3.93E-43  |
| hsa-miR-188-3p   | -1.9075583          | 6.10E-43  |
| hsa-miR-15b-3p   | 1.71333281          | 6.77E-43  |
| hsa-miR-224-5p   | 2.68086633          | 2.00E-41  |
| hsa-let-7e-5p    | -1.2276238          | 3.69E-41  |
| hsa-miR-203a-3p  | -1.9429694          | 7.76E-41  |
| hsa-miR-532-5p   | -1.2495286          | 7.75E-40  |

|                  |            |          |
|------------------|------------|----------|
| hsa-miR-30c-2-3p | -1.3990424 | 7.89E-40 |
| hsa-miR-592      | 3.05294673 | 6.41E-39 |
| hsa-miR-452-5p   | 1.94960842 | 2.05E-38 |
| hsa-miR-4772-3p  | 1.97135456 | 6.01E-38 |
| hsa-miR-142-3p   | 1.97163947 | 8.33E-38 |
| hsa-miR-500b-5p  | -1.2920104 | 6.36E-37 |
| hsa-miR-500a-5p  | -1.2915445 | 7.18E-37 |
| hsa-miR-1307-5p  | 1.61759827 | 7.25E-37 |
| hsa-miR-345-5p   | -1.0596644 | 1.69E-36 |
| hsa-miR-885-5p   | 3.63025299 | 4.77E-36 |
| hsa-miR-199a-5p  | -1.5610054 | 1.13E-35 |
| hsa-miR-149-5p   | -1.6215967 | 1.46E-35 |
| hsa-miR-200a-3p  | -1.3097146 | 6.08E-35 |
| hsa-miR-200c-3p  | -2.9271695 | 1.67E-34 |
| hsa-miR-125b-5p  | -1.1006009 | 6.15E-34 |
| hsa-miR-660-3p   | -1.8948743 | 1.28E-33 |
| hsa-miR-501-5p   | -1.2580532 | 3.84E-33 |
| hsa-miR-335-5p   | -1.6526036 | 6.80E-33 |
| hsa-miR-4677-3p  | 1.06839542 | 3.75E-32 |
| hsa-miR-342-5p   | 1.189491   | 8.98E-32 |
| hsa-miR-181b-5p  | 1.22311548 | 3.98E-31 |
| hsa-miR-590-3p   | 1.17220561 | 5.67E-31 |
| hsa-miR-1-3p     | -1.732759  | 6.60E-31 |
| hsa-miR-30a-3p   | -1.0129261 | 6.63E-31 |
| hsa-miR-142-5p   | 1.6365572  | 7.33E-31 |
| hsa-miR-452-3p   | 1.87112701 | 2.27E-30 |
| hsa-miR-502-3p   | -1.0334542 | 2.42E-30 |
| hsa-miR-93-5p    | 1.02527387 | 3.16E-30 |
| hsa-miR-21-3p    | 1.43223161 | 5.25E-30 |
| hsa-miR-216b-5p  | -3.4084332 | 7.77E-30 |
| hsa-miR-210-5p   | 2.31229081 | 1.38E-29 |
| hsa-miR-6509-5p  | 2.09891823 | 3.57E-29 |
| hsa-miR-181b-3p  | 1.12665968 | 1.12E-28 |
| hsa-miR-16-1-3p  | 1.15264435 | 6.62E-28 |
| hsa-miR-16-2-3p  | 1.39355144 | 3.17E-27 |
| hsa-miR-203b-3p  | -2.5823853 | 3.32E-27 |
| hsa-miR-214-3p   | -1.5962357 | 6.03E-27 |
| hsa-miR-30b-5p   | -1.0296169 | 5.26E-26 |
| hsa-miR-342-3p   | 1.0806015  | 8.38E-26 |
| hsa-miR-199a-3p  | -1.2235653 | 9.62E-26 |
| hsa-miR-199b-3p  | -1.2238289 | 1.01E-25 |
| hsa-miR-369-5p   | -1.8882641 | 3.48E-25 |
| hsa-miR-30b-3p   | -1.3941103 | 5.04E-25 |

|                  |            |          |
|------------------|------------|----------|
| hsa-miR-30c-1-3p | -1.3185117 | 3.97E-24 |
| hsa-miR-138-5p   | -2.3714868 | 4.65E-24 |
| hsa-miR-155-3p   | 3.2411184  | 6.15E-24 |
| hsa-miR-1251-5p  | -2.2620387 | 6.34E-24 |
| hsa-miR-200c-5p  | -3.0685737 | 3.91E-23 |
| hsa-miR-184      | -3.2663608 | 4.51E-23 |
| hsa-miR-129-2-3p | -2.8594828 | 1.07E-22 |
| hsa-miR-20b-5p   | -1.2146953 | 1.25E-22 |
| hsa-miR-3615     | 2.00545823 | 1.56E-22 |
| hsa-miR-433-3p   | -1.6611009 | 2.53E-21 |
| hsa-miR-1270     | 1.70762125 | 3.78E-21 |
| hsa-miR-204-5p   | -1.5894427 | 3.95E-21 |
| hsa-miR-136-5p   | -1.2933189 | 4.30E-21 |
| hsa-miR-3130-5p  | 1.43800049 | 6.55E-21 |
| hsa-miR-629-3p   | 1.19003966 | 9.36E-21 |
| hsa-miR-10a-5p   | -1.1388159 | 5.80E-20 |
| hsa-miR-214-5p   | -1.2198766 | 1.30E-19 |
| hsa-miR-4652-5p  | 3.25069127 | 1.33E-19 |
| hsa-miR-2355-3p  | 1.32517441 | 1.35E-19 |
| hsa-miR-1271-5p  | 1.29696488 | 3.24E-19 |
| hsa-miR-365a-3p  | 1.00056098 | 7.37E-19 |
| hsa-miR-365b-3p  | 1.00038598 | 7.40E-19 |
| hsa-miR-616-5p   | 1.32038155 | 1.30E-18 |
| hsa-miR-625-3p   | 1.05221376 | 1.98E-18 |
| hsa-miR-141-3p   | -2.4185319 | 2.92E-18 |
| hsa-miR-760      | 2.06074786 | 4.27E-18 |
| hsa-miR-154-5p   | -1.4759476 | 2.18E-17 |
| hsa-miR-144-5p   | 1.82747866 | 2.68E-17 |
| hsa-miR-2277-5p  | 1.41230117 | 3.61E-17 |
| hsa-miR-146a-5p  | 1.11503669 | 4.51E-17 |
| hsa-miR-144-3p   | 1.8304215  | 6.41E-17 |
| hsa-miR-502-5p   | -1.1332753 | 1.08E-16 |
| hsa-miR-130b-3p  | 1.01142818 | 2.39E-16 |
| hsa-miR-4772-5p  | 1.93754246 | 2.72E-16 |
| hsa-miR-376a-5p  | -1.6278752 | 3.75E-16 |
| hsa-miR-136-3p   | -1.1868864 | 7.93E-16 |
| hsa-miR-127-3p   | -1.123119  | 8.33E-16 |
| hsa-miR-3065-3p  | -1.4096307 | 8.86E-16 |
| hsa-miR-5586-5p  | 1.36976263 | 9.51E-16 |
| hsa-miR-550a-3p  | 1.25374503 | 1.58E-15 |
| hsa-miR-146b-5p  | 1.457793   | 7.28E-15 |
| hsa-miR-323b-3p  | -1.4430609 | 9.49E-15 |
| hsa-miR-585-3p   | -1.2424148 | 1.09E-14 |

|                 |            |          |
|-----------------|------------|----------|
| hsa-miR-875-5p  | 4.09454799 | 1.83E-14 |
| hsa-miR-215-5p  | 1.63657565 | 3.63E-14 |
| hsa-miR-411-5p  | -1.3432066 | 3.79E-14 |
| hsa-miR-135a-5p | -1.5618539 | 4.88E-14 |
| hsa-miR-500b-3p | -1.0346032 | 5.47E-14 |
| hsa-miR-10a-3p  | -1.0689817 | 7.47E-14 |
| hsa-miR-497-3p  | 1.38759728 | 1.60E-13 |
| hsa-miR-217-5p  | -1.52944   | 1.99E-13 |
| hsa-miR-33a-5p  | -1.12943   | 2.12E-13 |
| hsa-miR-675-3p  | -1.675035  | 4.44E-13 |
| hsa-miR-4746-5p | 1.37697753 | 5.41E-13 |
| hsa-miR-34a-3p  | 1.39392594 | 6.22E-13 |
| hsa-miR-3678-5p | 1.76708035 | 7.00E-13 |
| hsa-miR-33b-5p  | 1.3888317  | 2.18E-12 |
| hsa-miR-133a-3p | -1.0846098 | 2.29E-12 |
| hsa-miR-122b-5p | 2.11364884 | 2.49E-12 |
| hsa-miR-374c-5p | 2.79694129 | 3.51E-12 |
| hsa-miR-486-3p  | 1.5577819  | 5.33E-12 |
| hsa-miR-153-5p  | 1.21929741 | 6.81E-12 |
| hsa-miR-503-3p  | 1.05704989 | 1.80E-11 |
| hsa-miR-451a    | 1.45063088 | 1.89E-11 |
| hsa-miR-5588-3p | 1.56598636 | 1.91E-11 |
| hsa-miR-599     | 3.38909285 | 5.06E-11 |
| hsa-miR-204-3p  | -1.0522207 | 1.67E-10 |
| hsa-miR-224-3p  | 1.02763811 | 2.94E-10 |
| hsa-miR-18a-3p  | 1.11403362 | 3.67E-10 |
| hsa-miR-320d    | 1.19425662 | 4.21E-10 |
| hsa-miR-146b-3p | 1.06939285 | 5.00E-10 |
| hsa-miR-618     | 1.37146211 | 9.11E-10 |
| hsa-miR-199b-5p | -1.3708616 | 1.17E-09 |
| hsa-miR-3614-5p | 1.44537273 | 1.69E-09 |
| hsa-miR-653-5p  | 1.37117971 | 1.79E-09 |
| hsa-miR-1228-5p | 1.61609169 | 2.32E-09 |
| hsa-miR-4999-5p | 1.35639285 | 3.66E-09 |
| hsa-miR-3065-5p | -1.2000622 | 5.02E-09 |
| hsa-miR-1228-3p | 1.40302691 | 7.86E-09 |
| hsa-miR-937-3p  | 1.26658647 | 8.02E-09 |
| hsa-miR-141-5p  | -1.8443124 | 8.12E-09 |
| hsa-miR-874-5p  | -1.1928816 | 8.22E-09 |
| hsa-miR-7978    | 1.46461634 | 1.15E-08 |
| hsa-miR-4784    | 2.57545027 | 1.51E-08 |
| hsa-miR-486-5p  | 1.16063423 | 1.86E-08 |
| hsa-miR-221-3p  | 1.13001992 | 1.89E-08 |

|                  |            |            |
|------------------|------------|------------|
| hsa-miR-3690     | 1.37779725 | 6.55E-08   |
| hsa-miR-124-3p   | -1.2860929 | 6.97E-08   |
| hsa-miR-1295a    | 1.2554305  | 7.08E-08   |
| hsa-miR-548o-3p  | 1.18077305 | 9.48E-08   |
| hsa-let-7f-2-3p  | 1.05588679 | 1.21E-07   |
| hsa-miR-4536-3p  | 1.11809029 | 1.74E-07   |
| hsa-miR-891a-5p  | 3.98714973 | 3.71E-07   |
| hsa-miR-323a-3p  | -1.16608   | 4.93E-07   |
| hsa-miR-377-5p   | -1.037808  | 5.20E-07   |
| hsa-miR-7702     | 1.45871405 | 5.30E-07   |
| hsa-miR-3609     | 2.2496881  | 5.93E-07   |
| hsa-miR-133b     | -1.0975491 | 6.69E-07   |
| hsa-miR-6854-5p  | 1.29102702 | 7.38E-07   |
| hsa-miR-7110-3p  | 1.23838376 | 8.62E-07   |
| hsa-miR-3677-5p  | 1.05849757 | 1.45E-06   |
| hsa-miR-4454     | 2.22386608 | 1.50E-06   |
| hsa-miR-3922-3p  | 1.06843039 | 1.55E-06   |
| hsa-miR-301b-3p  | 1.06698738 | 2.42E-06   |
| hsa-miR-2114-3p  | 1.34096186 | 3.50E-06   |
| hsa-miR-134-3p   | -1.0488027 | 3.58E-06   |
| hsa-miR-935      | 1.07755987 | 4.29E-06   |
| hsa-miR-4484     | -1.2143296 | 6.26E-06   |
| hsa-miR-31-5p    | -1.087327  | 6.73E-06   |
| hsa-miR-6718-5p  | 1.46860759 | 7.66E-06   |
| hsa-miR-146a-3p  | 1.7418337  | 1.25E-05   |
| hsa-miR-187-3p   | -1.1653522 | 1.65E-05   |
| hsa-miR-653-3p   | 1.10553466 | 1.94E-05   |
| hsa-miR-3614-3p  | 1.00005984 | 2.96E-05   |
| hsa-miR-218-1-3p | -1.1062659 | 3.18E-05   |
| hsa-miR-891b     | 3.50012456 | 3.38E-05   |
| hsa-miR-1269b    | 2.86418457 | 4.17E-05   |
| hsa-miR-892c-3p  | 3.16262216 | 4.34E-05   |
| hsa-miR-892b     | 3.30582677 | 5.11E-05   |
| hsa-miR-216a-5p  | -1.0160934 | 6.01E-05   |
| hsa-miR-888-5p   | 3.35097271 | 7.44E-05   |
| hsa-miR-892a     | 3.30308788 | 0.00012553 |
| hsa-miR-1269a    | 1.96796921 | 0.00019475 |
| hsa-miR-206      | -1.2566039 | 0.00093808 |
| hsa-miR-802      | 1.53127079 | 0.00114905 |
| hsa-miR-137-3p   | 1.72854738 | 0.00211949 |
| hsa-miR-205-5p   | -1.0962982 | 0.00260384 |
