# Supplementary material for: A Novel miRNA-Based Model Can Predict the Prognosis of Clear Cell Renal Cell Carcinoma
Source: PubMed Central journal article supplement — Technol Cancer Res Treat. 2021 Jun 23;20:15330338211027923. doi: 10.1177/15330338211027923 (PMC8237220; doi:10.1177/15330338211027923), 2021-06-23
Supplement: sj-pdf-4-tct-10.1177_15330338211027923.pdf [file sj-pdf-4-tct-10.1177_15330338211027923.pdf]

**TableS4:** Gene ontology (GO) enrichment analysis of the possible downstream target genes.

| Ontology | Term                                                                 | P value    | Count |
|----------|----------------------------------------------------------------------|------------|-------|
| BP       | urogenital system development                                        | 6.63E-07   | 15    |
| BP       | renal system development                                             | 4.92E-06   | 13    |
| BP       | sodium ion transport                                                 | 8.08E-06   | 11    |
| BP       | axis elongation                                                      | 1.03E-05   | 5     |
| BP       | positive regulation of sodium ion transmembrane transporter activity | 1.33E-05   | 4     |
| BP       | kidney development                                                   | 1.51E-05   | 12    |
| BP       | regulation of ion transmembrane transport                            | 1.63E-05   | 16    |
| BP       | potassium ion transport                                              | 1.99E-05   | 11    |
| BP       | branch elongation of an epithelium                                   | 3.43E-05   | 4     |
| BP       | regulation of ion transmembrane transporter activity                 | 4.15E-05   | 11    |
| CC       | postsynaptic membrane                                                | 3.90E-05   | 12    |
| CC       | glutamatergic synapse                                                | 8.18E-05   | 12    |
| CC       | basolateral plasma membrane                                          | 0.00016225 | 9     |
| CC       | postsynaptic specialization                                          | 0.00033442 | 11    |
| CC       | main axon                                                            | 0.00037308 | 5     |
| CC       | synaptic membrane                                                    | 0.0005765  | 12    |
| CC       | postsynaptic density                                                 | 0.00074735 | 10    |
| CC       | asymmetric synapse                                                   | 0.00082071 | 10    |
| CC       | neuron to neuron synapse                                             | 0.00133803 | 10    |
| CC       | neuron projection membrane                                           | 0.00174714 | 4     |
| MF       | monovalent inorganic cation transmembrane transporter activity       | 8.44E-05   | 13    |
| MF       | metal ion transmembrane transporter activity                         | 0.00032279 | 13    |
| MF       | ion gated channel activity                                           | 0.00039418 | 11    |
| MF       | gated channel activity                                               | 0.00049261 | 11    |
| MF       | Rac GTPase binding                                                   | 0.00052762 | 5     |
| MF       | sodium ion transmembrane transporter activity                        | 0.00059662 | 7     |
