# Supplementary material for: A Novel miRNA-Based Model Can Predict the Prognosis of Clear Cell Renal Cell Carcinoma
Source: PubMed Central journal article supplement — Technol Cancer Res Treat. 2021 Jun 23;20:15330338211027923. doi: 10.1177/15330338211027923 (PMC8237220; doi:10.1177/15330338211027923), 2021-06-23
Supplement: sj-pdf-5-tct-10.1177_15330338211027923.pdf [file sj-pdf-5-tct-10.1177_15330338211027923.pdf]

**TableS5:** Kyoto Encyclopedia of Genes and Genomes (KEGG) pathways analysis of the possible downstream target genes.

| Id       | Term                                    | P value    | Count |
|----------|-----------------------------------------|------------|-------|
| hsa04066 | Hippo signaling pathway                 | 0.00019568 | 8     |
| hsa00590 | Progesterone-mediated oocyte maturation | 0.00356439 | 5     |
| hsa04216 | Propanoate metabolism                   | 0.00497883 | 3     |
| hsa01230 | Cushing syndrome                        | 0.00507869 | 6     |
| hsa05140 | Gastric acid secretion                  | 0.0075956  | 4     |
| hsa01210 | Tight junction                          | 0.00768132 | 6     |
| hsa05206 | Ovarian steroidogenesis                 | 0.01529508 | 3     |
| hsa05167 | Melanogenesis                           | 0.01994433 | 4     |
| hsa00270 | Protein digestion and absorption        | 0.0212688  | 4     |
| hsa00220 | Wnt signaling pathway                   | 0.02414112 | 5     |
